# Supplementary material
Source: PubMed Central journal article supplement (PMC5079497)
Supplement: 10.3163.1536-5050.104.4.014.sg001.pdf [file 10.3163.1536-5050.104.4.014.sg001.pdf]

## **How to identify existing literature on patients' knowledge, views, and values: the development of a validated search filter**

*Monique Wessels, MSc; Lian Hielkema, BA; Trudy van der Weijden, MD, PhD*

### **APPENDIX A**

#### **Scottish Intercollegiate Guidelines Network (SIGN) filter**

1. exp Patients/
2. patient\$.tw.
3. inpatient\$.tw.
4. outpatient\$.tw.
5. client\$.tw.
6. survivor\$.tw.
7. user\$.tw.
8. consumer\$.tw.
9. exp persons/
10. person\$.tw.
11. people\$.tw.
12. individual\$.tw.
13. victim\$.tw.
14. amputee\$.tw.
15. personal\$.tw.
16. adult\$.tw.
17. caregiver\$.tw.
18. (care adj giver\$).tw.
19. carer\$.tw.
20. guardian\$.tw.
21. exp family/
22. family.tw.
23. families.tw.
24. relative\$.tw.
25. relation\$.tw.
26. spouse\$.tw.
27. partner\$.tw.
28. parent\$.tw.
29. stepparent\$.tw.
30. step-parent\$.tw.
31. husband\$.tw.
32. wife.tw.
33. wives.tw.
34. chld\$.tw.
35. offspring.tw.
36. daughter\$.tw.
37. father\$.tw.
38. stepfather\$.tw.
39. step-father\$.tw.
40. mother\$.tw.
41. brother\$.tw.
42. sister\$.tw.
43. sibling\$.tw.
44. "next of kin".tw.
45. woman\$.tw.
46. women\$.tw.
47. friend.tw.
48. friends.tw.
49. exp focus groups/
50. stepmother\$.tw.
51. step-mother\$.tw.
52. (focus adj group\$).tw.
53. exp Self-Help Groups/
54. "self-help group\$".tw.
55. "support group\$".tw.
56. exp Community Networks/
57. "community network\$".tw.
58. exp social support/
59. "social support".tw.
60. "social network\$".tw.
61. "terminally ill".tw.
62. sufferer.tw.
63. sufferers.tw.
64. or/1-63
65. view\$.tw.
66. experience\$.tw.
67. perspective\$.tw.
68. perception/
69. social perception/
70. perception\$.tw.
71. narrative\$.tw.
72. discourse\$.tw.

73. story.tw.
74. stories.tw.
75. satisfaction.tw.
76. perceived.tw.
77. concern\$.tw.
78. issue\$.tw.
79. exp attitude/  
80. attitude\$.tw.
81. exp emotions/  
82. emotion\$.tw.
83. anger\$.tw.
84. fear\$.tw.
85. disappoint\$.tw.
86. angry.tw.
87. afraid.tw.
88. sadness.tw.
89. distress\$.tw.
90. nervous\$.tw.
91. anxiety.tw.
92. anxieties.tw.
93. anxious\$.tw.
94. euphoria.tw.
95. euphoric.tw.
96. frustat\$.tw.
97. guilt\$.tw.
98. hate\$.tw.
99. hatred.tw.
100. hostility.tw.
101. jealous\$.tw.
102. loneliness.tw.
103. lonely.tw.
104. grief.tw.
105. grieving.tw.
106. bereavement\$.tw.
107. mourn\$.tw.
108. mood\$.tw.
109. feeling\$.tw.
110. happiness.tw.
111. happy.tw.
112. joy\$.tw.
113. laugh\$.tw.
114. love.tw.
115. loving.tw.
116. honest\$.tw.
117. despair\$.tw.
118. hope\$.tw.
119. hoping.tw.
120. exp empathy/  
121. empathy.tw.
122. compassion\$.tw.
123. exp Negativism/  
124. faith\$.tw.
125. ethics/  
126. morale.tw.
127. exp morale/  
128. "unmet need\$.tw.
129. exp human rights/  
130. exp stress, psychological/  
131. exp adaptation, psychological/  
132. ((psycho\$ or social) adj adjust\$.tw.
133. cope.tw.
134. coping.tw.
135. exp psychology, social/  
136. "social values".tw.
137. worry\$.tw.
138. worries.tw.
139. exp quality of life/  
140. "quality of life".tw.
141. qol.tw.
142. "quality of recovery".tw.
143. dignity.tw.
144. dignif\$.tw.
145. "right to die".tw.
146. "patient advocacy".tw.
147. exp suicide/  
148. suicid\$.tw.
149. exp euthanasia/  
150. euthanasia.tw.
151. "right to live".tw.
152. "right to choose".tw.
153. (choice\$ or empower\$.tw.
154. "self esteem".tw.
155. exp decision making/  
156. (decision adj making).tw.
157. exp communication/  
158. "access to information".tw.
159. exp confidentiality/  
160. confidentiality.tw.
161. privacy.tw.
162. (truth adj3 disclosure\$.tw.
163. ((psycho\$ or cultural) adj depriv\$.tw.
164. social isolation/

165. "social isolation".tw.
166. "access to services".tw.
167. exp information services/
168. exp counseling/
169. counsel\$.tw.
170. (pastoral adj (care or psychology)).tw.
171. spiritual\$.tw.
172. exp religion/
173. (beliefs or prayer\$ or customs).tw.
174. exp sexuality/
175. sexuality.tw.
176. exp culture/
177. ((psycho\$ or social) adj support).tw.
178. exp social support/
179. exp self-help groups/
180. "self-help group\$".tw.
181. "support group\$".tw.
182. exp community networks/
183. "community network\$".tw.
184. "social network\$".tw.
185. misperception\$.tw.
186. suffer\$.tw.
187. exp pain/
188. pain.tw.
189. comfort\$.tw.
190. comfortable.tw.
191. 189 not 190
192. or/65-188,191
193. 64 and 192
194. exp Patients/ed, px [Education, Psychology]
195. exp persons/ed, px
196. exp family/ed, px [Education, Psychology]
197. exp Interpersonal Relations/
198. exp Family Relations/
199. exp Professional-Patient Relations/
200. Consumer Satisfaction/
201. exp Consumer Participation/
202. exp Patient Education/
203. exp personal satisfaction/
204. "patient information".tw.
205. (patient adj (leaflet\$ or booklet\$ or pamphlet\$)).tw.
206. or/194-205
207. 193 or 206
